# Supplementary material for: Effect of green tea consumption on blood pressure: A meta-analysis of 13 randomized controlled trials
Source: PubMed Central journal article supplement — Sci Rep. 2014 Sep 1;4:6251. doi: 10.1038/srep06251 (PMC4150247; doi:10.1038/srep06251), 2014-09-01

**Title:** Effect of green tea consumption on blood pressure: A meta-analysis of 13 randomized controlled trials

Xiaoli Peng<sup>1,2\*</sup>, Rui Zhou<sup>2\*</sup>, Bin Wang<sup>2</sup>, Xiaoping Yu<sup>1</sup>, Xiaohong Yang<sup>2</sup>, Kai Liu<sup>2</sup>, Mantian Mi<sup>2</sup>

<sup>1</sup>Department of Epidemiology and Health Statistics, Institute of Public Health, Chengdu Medical College, Chengdu 610083, Sichuan, China

<sup>2</sup>Research Center for Nutrition and Food Safety, Institute of Military Preventive Medicine, Third Military Medical University, Chongqing Key Laboratory of Nutrition and Food Safety, Chongqing Medical Nutrition Research Center, Chongqing 400038, China.

\*These authors contributed equally to this article.

**Correspondence and requests for materials should be addressed to** Kai Liu or Mantian Mi (Research Center for Nutrition and Food Safety, Institute of Military Preventive Medicine, Third Military Medical University, Chongqing Key Laboratory of Nutrition and Food Safety, Chongqing Medical Nutrition Research Center, Chongqing 400038, China. Tel: +86 2368752306, Fax: +86 2368752307, *E-mail address:* kai.liu.tmmu@gmail.com or [mantian.mi.tmmu@gmail.com](mailto:mantian.mi.tmmu@gmail.com)).

## **Supplementary Figure Legends**

**Supplementary Figure S1. Meta-analysis of effects of green tea on systolic blood pressure (SBP).** Weight was assigned with STATA (Version 11; StataCorp, College Station, TX) by using number of subjects and SD. Sizes of data markers indicate the

weight of each study in this analysis. The diamond represents the overall estimated effect and the result was obtained from a random-effects model. WMD, weighted mean difference.

**Supplementary Figure S2. Meta-analysis of effects of green tea on diastolic blood pressure (DBP).** Weight was assigned with STATA (Version 11; StataCorp, College Station, TX) by using number of subjects and SD. Sizes of data markers indicate the weight of each study in this analysis. The diamond represents the overall estimated effect and the result was obtained from a fixed-effects model. WMD, weighted mean difference.

**Supplementary Figure S3. Funnel plot to detect the publication bias of the studies investigating the effect of green tea consumption on systolic blood pressure (SBP).** WMD, weighted mean difference.

**Supplementary Figure S4. Funnel plot to detect the publication bias of the studies investigating the effect of green tea consumption on diastolic blood pressure (DBP).** WMD, weighted mean difference.

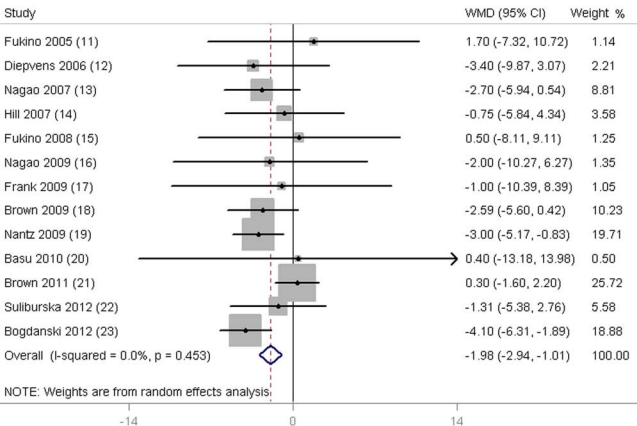

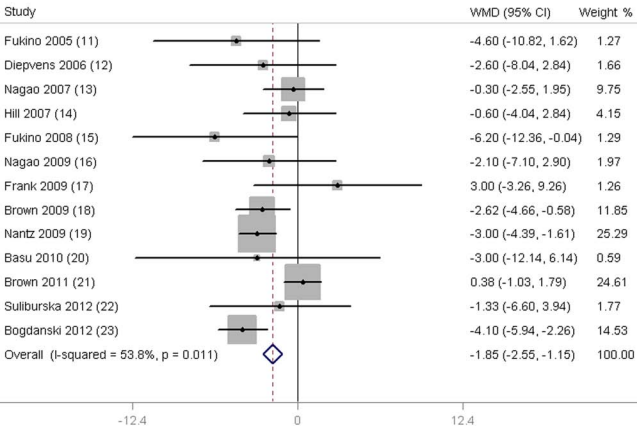

Funnel plot with pseudo 95% confidence limits

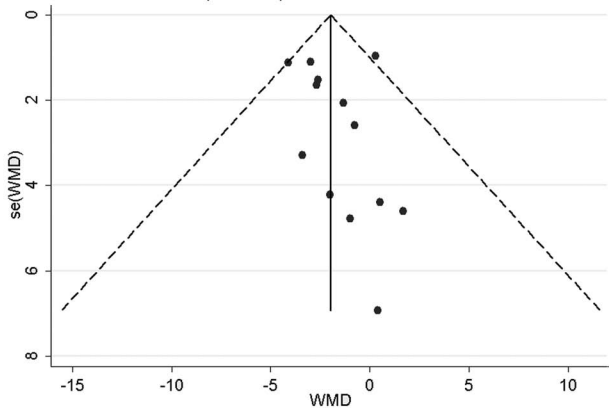

Funnel plot with pseudo 95% confidence limits

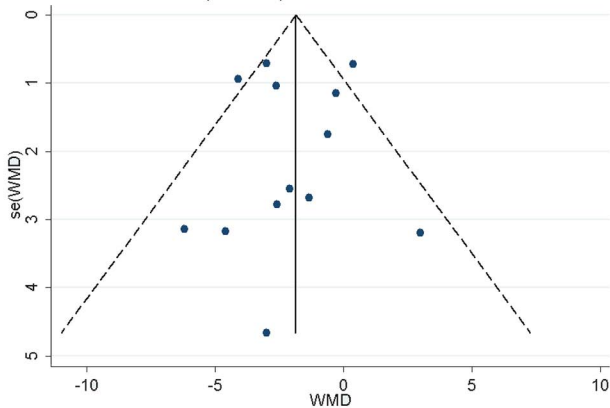

Supplement: srep06251-s1.pdf [file srep06251-s1.pdf]
